# Supplementary material for: Synthesis of 3-O-sulfonated heparan sulfate octasaccharides that inhibit the herpes simplex virus type 1 host–cell interaction
Source: Springer Nature journal article supplement (doi:10.1038/nchem.1073), 2011-06-17
Supplement: 41557_2011_BFnchem1073_MOESM1_ESM.mol [file 41557_2011_BFnchem1073_MOESM1_ESM.mol]

  ChemDraw06021118482D

136132  0  0  0  0  0  0  0  0999 V2000
  -13.5296    2.9464    0.0000 Na  0  3  0  0  0  0  0  0  0  0  0  0
   -9.3040   -1.8253    0.0000 Na  0  3  0  0  0  0  0  0  0  0  0  0
   -5.4233   -2.6302    0.0000 Na  0  3  0  0  0  0  0  0  0  0  0  0
    1.5331   -3.1764    0.0000 Na  0  3  0  0  0  0  0  0  0  0  0  0
    4.4939   -3.3776    0.0000 Na  0  3  0  0  0  0  0  0  0  0  0  0
    6.7073   -3.3489    0.0000 Na  0  3  0  0  0  0  0  0  0  0  0  0
   11.7091   -3.1189    0.0000 Na  0  3  0  0  0  0  0  0  0  0  0  0
   10.0706    3.3776    0.0000 Na  0  3  0  0  0  0  0  0  0  0  0  0
    5.4713    2.4865    0.0000 Na  0  3  0  0  0  0  0  0  0  0  0  0
   -0.9965    2.1990    0.0000 Na  0  3  0  0  0  0  0  0  0  0  0  0
   -7.6080    3.0614    0.0000 Na  0  3  0  0  0  0  0  0  0  0  0  0
  -11.7411    1.4251    0.0000 C   0  0  0  0  0  0  0  0  0  0  0  0
  -11.9906    0.6358    0.0000 C   0  0  0  0  0  0  0  0  0  0  0  0
  -11.4318    0.0251    0.0000 C   0  0  0  0  0  0  0  0  0  0  0  0
  -10.6235    0.2037    0.0000 C   0  0  0  0  0  0  0  0  0  0  0  0
  -10.3740    0.9930    0.0000 C   0  0  0  0  0  0  0  0  0  0  0  0
  -10.9328    1.6037    0.0000 O   0  0  0  0  0  0  0  0  0  0  0  0
   -9.5685    1.1710    0.0000 O   0  0  0  0  0  0  0  0  0  0  0  0
   -8.7450    1.1203    0.0000 C   0  0  0  0  0  0  0  0  0  0  0  0
   -8.3759    0.3794    0.0000 C   0  0  0  0  0  0  0  0  0  0  0  0
   -7.5497    0.3285    0.0000 C   0  0  0  0  0  0  0  0  0  0  0  0
   -7.0926    1.0186    0.0000 C   0  0  0  0  0  0  0  0  0  0  0  0
   -7.4616    1.7596    0.0000 O   0  0  0  0  0  0  0  0  0  0  0  0
   -8.2879    1.8104    0.0000 C   0  0  0  0  0  0  0  0  0  0  0  0
   -5.4441    0.9691    0.0000 C   0  0  0  0  0  0  0  0  0  0  0  0
   -5.0292    0.2529    0.0000 C   0  0  0  0  0  0  0  0  0  0  0  0
   -4.2014    0.2541    0.0000 C   0  0  0  0  0  0  0  0  0  0  0  0
   -3.7886    0.9716    0.0000 C   0  0  0  0  0  0  0  0  0  0  0  0
   -4.2035    1.6879    0.0000 O   0  0  0  0  0  0  0  0  0  0  0  0
   -5.0313    1.6866    0.0000 C   0  0  0  0  0  0  0  0  0  0  0  0
   -2.9636    0.9728    0.0000 O   0  0  0  0  0  0  0  0  0  0  0  0
   -2.2123    0.6318    0.0000 C   0  0  0  0  0  0  0  0  0  0  0  0
   -2.1317   -0.1920    0.0000 C   0  0  0  0  0  0  0  0  0  0  0  0
   -1.3780   -0.5342    0.0000 C   0  0  0  0  0  0  0  0  0  0  0  0
   -0.7048   -0.0524    0.0000 C   0  0  0  0  0  0  0  0  0  0  0  0
   -0.7854    0.7714    0.0000 O   0  0  0  0  0  0  0  0  0  0  0  0
   -1.5392    1.1135    0.0000 C   0  0  0  0  0  0  0  0  0  0  0  0
    0.0464   -0.3934    0.0000 O   0  0  0  0  0  0  0  0  0  0  0  0
    0.8525   -0.2179    0.0000 C   0  0  0  0  0  0  0  0  0  0  0  0
    1.4095   -0.8303    0.0000 C   0  0  0  0  0  0  0  0  0  0  0  0
    2.2183   -0.6541    0.0000 C   0  0  0  0  0  0  0  0  0  0  0  0
    2.4702    0.1344    0.0000 C   0  0  0  0  0  0  0  0  0  0  0  0
    1.9132    0.7468    0.0000 O   0  0  0  0  0  0  0  0  0  0  0  0
    1.1044    0.5707    0.0000 C   0  0  0  0  0  0  0  0  0  0  0  0
    3.2763    0.3100    0.0000 O   0  0  0  0  0  0  0  0  0  0  0  0
    4.1006    0.3450    0.0000 C   0  0  0  0  0  0  0  0  0  0  0  0
    4.5445   -0.3536    0.0000 C   0  0  0  0  0  0  0  0  0  0  0  0
    5.3716   -0.3185    0.0000 C   0  0  0  0  0  0  0  0  0  0  0  0
    5.7546    0.4154    0.0000 C   0  0  0  0  0  0  0  0  0  0  0  0
    5.3107    1.1140    0.0000 O   0  0  0  0  0  0  0  0  0  0  0  0
    4.4836    1.0788    0.0000 C   0  0  0  0  0  0  0  0  0  0  0  0
    6.5789    0.4504    0.0000 O   0  0  0  0  0  0  0  0  0  0  0  0
    7.3903    0.3013    0.0000 C   0  0  0  0  0  0  0  0  0  0  0  0
    7.6678   -0.4786    0.0000 C   0  0  0  0  0  0  0  0  0  0  0  0
    8.4820   -0.6281    0.0000 C   0  0  0  0  0  0  0  0  0  0  0  0
    9.0186    0.0021    0.0000 C   0  0  0  0  0  0  0  0  0  0  0  0
    8.7411    0.7820    0.0000 O   0  0  0  0  0  0  0  0  0  0  0  0
    7.9269    0.9316    0.0000 C   0  0  0  0  0  0  0  0  0  0  0  0
    9.8300   -0.1469    0.0000 O   0  0  0  0  0  0  0  0  0  0  0  0
   10.6548   -0.1670    0.0000 C   0  0  0  0  0  0  0  0  0  0  0  0
   11.0511   -0.8938    0.0000 C   0  0  0  0  0  0  0  0  0  0  0  0
   11.8786   -0.9140    0.0000 C   0  0  0  0  0  0  0  0  0  0  0  0
   12.3099   -0.2074    0.0000 C   0  0  0  0  0  0  0  0  0  0  0  0
   11.9136    0.5194    0.0000 O   0  0  0  0  0  0  0  0  0  0  0  0
   11.0860    0.5395    0.0000 C   0  0  0  0  0  0  0  0  0  0  0  0
  -12.2981    2.0338    0.0000 C   0  0  0  0  0  0  0  0  0  0  0  0
  -11.6804   -0.7615    0.0000 O   0  0  0  0  0  0  0  0  0  0  0  0
   -8.6557    2.5489    0.0000 C   0  0  0  0  0  0  0  0  0  0  0  0
   -8.8316   -0.3084    0.0000 O   0  0  0  0  0  0  0  0  0  0  0  0
   -5.4406   -0.4622    0.0000 O   0  0  0  0  0  0  0  0  0  0  0  0
   -1.6195    1.9346    0.0000 C   0  0  0  0  0  0  0  0  0  0  0  0
   -2.8027   -0.6721    0.0000 O   0  0  0  0  0  0  0  0  0  0  0  0
    1.1585   -1.6161    0.0000 O   0  0  0  0  0  0  0  0  0  0  0  0
    4.0411    1.7752    0.0000 C   0  0  0  0  0  0  0  0  0  0  0  0
    4.1627   -1.0850    0.0000 O   0  0  0  0  0  0  0  0  0  0  0  0
    7.1330   -1.1067    0.0000 O   0  0  0  0  0  0  0  0  0  0  0  0
   10.6911    1.2638    0.0000 C   0  0  0  0  0  0  0  0  0  0  0  0
   -9.4791    2.5996    0.0000 O   0  0  0  0  0  0  0  0  0  0  0  0
   -2.3707    2.2756    0.0000 O   0  0  0  0  0  0  0  0  0  0  0  0
    3.2169    1.7401    0.0000 O   0  0  0  0  0  0  0  0  0  0  0  0
  -13.1036    1.8558    0.0000 O   0  5  0  0  0  0  0  0  0  0  0  0
  -12.0494    2.8204    0.0000 O   0  0  0  0  0  0  0  0  0  0  0  0
  -12.7962    0.4578    0.0000 O   0  0  0  0  0  0  0  0  0  0  0  0
  -10.0666   -0.4049    0.0000 O   0  0  0  0  0  0  0  0  0  0  0  0
   -5.4449    2.4005    0.0000 C   0  0  0  0  0  0  0  0  0  0  0  0
    0.5493    1.1810    0.0000 C   0  0  0  0  0  0  0  0  0  0  0  0
    7.6503    1.7088    0.0000 C   0  0  0  0  0  0  0  0  0  0  0  0
   12.2736   -1.6383    0.0000 N   0  0  0  0  0  0  0  0  0  0  0  0
   13.1346   -0.2275    0.0000 O   0  0  0  0  0  0  0  0  0  0  0  0
   -7.1819   -0.4100    0.0000 N   0  0  0  0  0  0  0  0  0  0  0  0
   -7.3658   -1.2142    0.0000 S   0  0  0  0  0  0  0  0  0  0  0  0
   -8.1701   -1.0303    0.0000 O   0  0  0  0  0  0  0  0  0  0  0  0
   -6.5616   -1.3981    0.0000 O   0  0  0  0  0  0  0  0  0  0  0  0
   -7.5498   -2.0184    0.0000 O   0  5  0  0  0  0  0  0  0  0  0  0
   -6.2691    0.9679    0.0000 O   0  0  0  0  0  0  0  0  0  0  0  0
   -5.0334    3.1156    0.0000 O   0  0  0  0  0  0  0  0  0  0  0  0
   -6.2699    2.3993    0.0000 O   0  5  0  0  0  0  0  0  0  0  0  0
   -3.7878   -0.4598    0.0000 O   0  0  0  0  0  0  0  0  0  0  0  0
   -4.1993   -1.1748    0.0000 S   0  0  0  0  0  0  0  0  0  0  0  0
   -3.4842   -1.5863    0.0000 O   0  0  0  0  0  0  0  0  0  0  0  0
   -4.9144   -0.7634    0.0000 O   0  0  0  0  0  0  0  0  0  0  0  0
   -4.6107   -1.8899    0.0000 O   0  5  0  0  0  0  0  0  0  0  0  0
   -1.2977   -1.3552    0.0000 N   0  0  0  0  0  0  0  0  0  0  0  0
   -1.8495   -2.6517    0.0000 O   0  0  0  0  0  0  0  0  0  0  0  0
   -1.9686   -1.8353    0.0000 C   0  0  0  0  0  0  0  0  0  0  0  0
   -2.7351   -1.5303    0.0000 C   0  0  0  0  0  0  0  0  0  0  0  0
    0.8003    1.9669    0.0000 O   0  0  0  0  0  0  0  0  0  0  0  0
   -0.2568    1.0054    0.0000 O   0  5  0  0  0  0  0  0  0  0  0  0
    2.7734   -1.2644    0.0000 O   0  0  0  0  0  0  0  0  0  0  0  0
    2.8575   -2.0851    0.0000 S   0  0  0  0  0  0  0  0  0  0  0  0
    2.0368   -2.1692    0.0000 O   0  0  0  0  0  0  0  0  0  0  0  0
    3.6782   -2.0011    0.0000 O   0  0  0  0  0  0  0  0  0  0  0  0
    2.9416   -2.9058    0.0000 O   0  5  0  0  0  0  0  0  0  0  0  0
    5.8140   -1.0148    0.0000 N   0  0  0  0  0  0  0  0  0  0  0  0
    5.4858   -1.7717    0.0000 S   0  0  0  0  0  0  0  0  0  0  0  0
    4.7289   -1.4435    0.0000 O   0  0  0  0  0  0  0  0  0  0  0  0
    6.2428   -2.0999    0.0000 O   0  0  0  0  0  0  0  0  0  0  0  0
    5.1577   -2.5286    0.0000 O   0  5  0  0  0  0  0  0  0  0  0  0
    6.8389    1.8579    0.0000 O   0  5  0  0  0  0  0  0  0  0  0  0
    8.1851    2.3370    0.0000 O   0  0  0  0  0  0  0  0  0  0  0  0
    9.8663    1.2840    0.0000 O   0  0  0  0  0  0  0  0  0  0  0  0
    9.5025    2.0244    0.0000 S   0  0  0  0  0  0  0  0  0  0  0  0
   10.2430    2.3882    0.0000 O   0  0  0  0  0  0  0  0  0  0  0  0
    8.7621    1.6606    0.0000 O   0  0  0  0  0  0  0  0  0  0  0  0
    9.1388    2.7649    0.0000 O   0  5  0  0  0  0  0  0  0  0  0  0
   13.5296   -0.9518    0.0000 C   0  0  0  0  0  0  0  0  0  0  0  0
    8.7586   -1.4054    0.0000 O   0  0  0  0  0  0  0  0  0  0  0  0
    8.2238   -2.0336    0.0000 S   0  0  0  0  0  0  0  0  0  0  0  0
    8.8519   -2.5684    0.0000 O   0  0  0  0  0  0  0  0  0  0  0  0
    7.5956   -1.4987    0.0000 O   0  0  0  0  0  0  0  0  0  0  0  0
    7.6890   -2.6617    0.0000 O   0  5  0  0  0  0  0  0  0  0  0  0
   10.6213   -1.5980    0.0000 O   0  0  0  0  0  0  0  0  0  0  0  0
   10.6928   -2.4199    0.0000 S   0  0  0  0  0  0  0  0  0  0  0  0
   11.5147   -2.3484    0.0000 O   0  0  0  0  0  0  0  0  0  0  0  0
    9.8709   -2.4914    0.0000 O   0  0  0  0  0  0  0  0  0  0  0  0
   10.7642   -3.2418    0.0000 O   0  5  0  0  0  0  0  0  0  0  0  0
 12 13  1  0      
 13 14  1  0      
 14 15  1  0      
 15 16  1  0      
 16 17  1  0      
 17 12  1  0      
 16 18  1  1      
 19 18  1  6      
 19 20  1  0      
 20 21  1  0      
 21 22  1  0      
 22 23  1  0      
 23 24  1  0      
 24 19  1  0      
 22 95  1  6      
 25 26  1  0      
 26 27  1  0      
 27 28  1  0      
 28 29  1  0      
 29 30  1  0      
 30 25  1  0      
 28 31  1  1      
 32 31  1  6      
 32 33  1  0      
 33 34  1  0      
 34 35  1  0      
 35 36  1  0      
 36 37  1  0      
 37 32  1  0      
 35 38  1  6      
 39 38  1  6      
 39 40  1  0      
 40 41  1  0      
 41 42  1  0      
 42 43  1  0      
 43 44  1  0      
 44 39  1  0      
 42 45  1  1      
 46 45  1  6      
 46 47  1  0      
 47 48  1  0      
 48 49  1  0      
 49 50  1  0      
 50 51  1  0      
 51 46  1  0      
 49 52  1  6      
 53 52  1  6      
 53 54  1  0      
 54 55  1  0      
 55 56  1  0      
 56 57  1  0      
 57 58  1  0      
 58 53  1  0      
 56 59  1  1      
 60 59  1  6      
 60 61  1  0      
 61 62  1  0      
 62 63  1  0      
 63 64  1  0      
 64 65  1  0      
 65 60  1  0      
 12 66  1  1      
 14 67  1  1      
 24 68  1  1      
 20 69  1  1      
 26 70  1  1      
 37 71  1  1      
 33 72  1  1      
 40 73  1  1      
 51 74  1  1      
 47 75  1  1      
 54 76  1  1      
 65 77  1  1      
 61132  1  1      
 68 78  1  0      
 71 79  1  0      
 74 80  1  0      
 77121  1  0      
 66 81  1  0      
 66 82  2  0      
 13 83  1  6      
 15 84  1  6      
 21 90  1  6      
 30 85  1  6      
 27 98  1  6      
 34103  1  6      
 44 86  1  6      
 41109  1  6      
 48114  1  6      
 58 87  1  6      
 55127  1  6      
 62 88  1  6      
 63 89  1  6      
 90 91  1  0      
 91 92  2  0      
 91 93  2  0      
 91 94  1  0      
 25 95  1  6      
 85 96  2  0      
 85 97  1  0      
 98 99  1  0      
 99100  2  0      
 99101  2  0      
 99102  1  0      
103105  1  0      
104105  2  0      
105106  1  0      
 86107  2  0      
 86108  1  0      
109110  1  0      
110111  2  0      
110112  2  0      
110113  1  0      
114115  1  0      
115116  2  0      
115117  2  0      
115118  1  0      
 87119  1  0      
 87120  2  0      
121122  1  0      
122123  2  0      
122124  2  0      
122125  1  0      
 89126  1  0      
127128  1  0      
128129  2  0      
128130  2  0      
128131  1  0      
132133  1  0      
133134  2  0      
133135  2  0      
133136  1  0      
M  CHG  8   1   1   2   1   3   1   4   1   5   1   6   1   7   1   8   1
M  CHG  8   9   1  10   1  11   1  81  -1  94  -1  97  -1 102  -1 108  -1
M  CHG  6 113  -1 118  -1 119  -1 125  -1 131  -1 136  -1
M  END
