# Supplementary material for: Synthesis of 3-O-sulfonated heparan sulfate octasaccharides that inhibit the herpes simplex virus type 1 host–cell interaction
Source: Springer Nature journal article supplement (doi:10.1038/nchem.1073), 2011-06-17
Supplement: 41557_2011_BFnchem1073_MOESM3_ESM.mol [file 41557_2011_BFnchem1073_MOESM3_ESM.mol]

  ChemDraw06021118482D

163153  0  0  0  0  0  0  0  0999 V2000
  -13.4378    2.4003    0.0000 Na  0  3  0  0  0  0  0  0  0  0  0  0
  -11.8280    3.7801    0.0000 Na  0  3  0  0  0  0  0  0  0  0  0  0
   -7.1137    3.1476    0.0000 Na  0  3  0  0  0  0  0  0  0  0  0  0
   -4.3254    3.8375    0.0000 Na  0  3  0  0  0  0  0  0  0  0  0  0
    0.9351    3.0039    0.0000 Na  0  3  0  0  0  0  0  0  0  0  0  0
    5.6493    2.3428    0.0000 Na  0  3  0  0  0  0  0  0  0  0  0  0
    8.1215    3.1189    0.0000 Na  0  3  0  0  0  0  0  0  0  0  0  0
   10.1624   -3.6938    0.0000 Na  0  3  0  0  0  0  0  0  0  0  0  0
    7.3741   -3.7513    0.0000 Na  0  3  0  0  0  0  0  0  0  0  0  0
    6.0230   -3.7513    0.0000 Na  0  3  0  0  0  0  0  0  0  0  0  0
    4.2121   -3.8375    0.0000 Na  0  3  0  0  0  0  0  0  0  0  0  0
    2.0561   -3.6938    0.0000 Na  0  3  0  0  0  0  0  0  0  0  0  0
   -3.2331   -3.4351    0.0000 Na  0  3  0  0  0  0  0  0  0  0  0  0
   -5.4177   -2.8314    0.0000 Na  0  3  0  0  0  0  0  0  0  0  0  0
   -8.5510   -2.8889    0.0000 Na  0  3  0  0  0  0  0  0  0  0  0  0
  -11.5405   -2.8027    0.0000 Na  0  3  0  0  0  0  0  0  0  0  0  0
   -0.6172    1.6816    0.0000 Na  0  3  0  0  0  0  0  0  0  0  0  0
  -11.8330    1.1186    0.0000 C   0  0  0  0  0  0  0  0  0  0  0  0
  -12.0824    0.3293    0.0000 C   0  0  0  0  0  0  0  0  0  0  0  0
  -11.5236   -0.2814    0.0000 C   0  0  0  0  0  0  0  0  0  0  0  0
  -10.7153   -0.1028    0.0000 C   0  0  0  0  0  0  0  0  0  0  0  0
  -10.4659    0.6865    0.0000 C   0  0  0  0  0  0  0  0  0  0  0  0
  -11.0247    1.2972    0.0000 O   0  0  0  0  0  0  0  0  0  0  0  0
   -9.6603    0.8645    0.0000 O   0  0  0  0  0  0  0  0  0  0  0  0
   -8.8368    0.8139    0.0000 C   0  0  0  0  0  0  0  0  0  0  0  0
   -8.4678    0.0729    0.0000 C   0  0  0  0  0  0  0  0  0  0  0  0
   -7.6416    0.0220    0.0000 C   0  0  0  0  0  0  0  0  0  0  0  0
   -7.1844    0.7121    0.0000 C   0  0  0  0  0  0  0  0  0  0  0  0
   -7.5535    1.4531    0.0000 O   0  0  0  0  0  0  0  0  0  0  0  0
   -8.3797    1.5039    0.0000 C   0  0  0  0  0  0  0  0  0  0  0  0
   -5.5360    0.6627    0.0000 C   0  0  0  0  0  0  0  0  0  0  0  0
   -5.1210   -0.0536    0.0000 C   0  0  0  0  0  0  0  0  0  0  0  0
   -4.2932   -0.0524    0.0000 C   0  0  0  0  0  0  0  0  0  0  0  0
   -3.8804    0.6651    0.0000 C   0  0  0  0  0  0  0  0  0  0  0  0
   -4.2953    1.3814    0.0000 O   0  0  0  0  0  0  0  0  0  0  0  0
   -5.1231    1.3802    0.0000 C   0  0  0  0  0  0  0  0  0  0  0  0
   -3.0554    0.6663    0.0000 O   0  0  0  0  0  0  0  0  0  0  0  0
   -2.3042    0.3254    0.0000 C   0  0  0  0  0  0  0  0  0  0  0  0
   -2.2236   -0.4985    0.0000 C   0  0  0  0  0  0  0  0  0  0  0  0
   -1.4698   -0.8406    0.0000 C   0  0  0  0  0  0  0  0  0  0  0  0
   -0.7966   -0.3589    0.0000 C   0  0  0  0  0  0  0  0  0  0  0  0
   -0.8772    0.4649    0.0000 O   0  0  0  0  0  0  0  0  0  0  0  0
   -1.6310    0.8071    0.0000 C   0  0  0  0  0  0  0  0  0  0  0  0
   -0.0454   -0.6999    0.0000 O   0  0  0  0  0  0  0  0  0  0  0  0
    0.7607   -0.5243    0.0000 C   0  0  0  0  0  0  0  0  0  0  0  0
    1.3177   -1.1367    0.0000 C   0  0  0  0  0  0  0  0  0  0  0  0
    2.1265   -0.9606    0.0000 C   0  0  0  0  0  0  0  0  0  0  0  0
    2.3784   -0.1720    0.0000 C   0  0  0  0  0  0  0  0  0  0  0  0
    1.8214    0.4404    0.0000 O   0  0  0  0  0  0  0  0  0  0  0  0
    1.0126    0.2642    0.0000 C   0  0  0  0  0  0  0  0  0  0  0  0
    3.1845    0.0035    0.0000 O   0  0  0  0  0  0  0  0  0  0  0  0
    4.0087    0.0386    0.0000 C   0  0  0  0  0  0  0  0  0  0  0  0
    4.4527   -0.6601    0.0000 C   0  0  0  0  0  0  0  0  0  0  0  0
    5.2797   -0.6249    0.0000 C   0  0  0  0  0  0  0  0  0  0  0  0
    5.6628    0.1089    0.0000 C   0  0  0  0  0  0  0  0  0  0  0  0
    5.2188    0.8075    0.0000 O   0  0  0  0  0  0  0  0  0  0  0  0
    4.3918    0.7724    0.0000 C   0  0  0  0  0  0  0  0  0  0  0  0
    6.4871    0.1439    0.0000 O   0  0  0  0  0  0  0  0  0  0  0  0
    7.2985   -0.0052    0.0000 C   0  0  0  0  0  0  0  0  0  0  0  0
    7.5760   -0.7850    0.0000 C   0  0  0  0  0  0  0  0  0  0  0  0
    8.3902   -0.9346    0.0000 C   0  0  0  0  0  0  0  0  0  0  0  0
    8.9268   -0.3043    0.0000 C   0  0  0  0  0  0  0  0  0  0  0  0
    8.6493    0.4756    0.0000 O   0  0  0  0  0  0  0  0  0  0  0  0
    7.8351    0.6251    0.0000 C   0  0  0  0  0  0  0  0  0  0  0  0
    9.7382   -0.4534    0.0000 O   0  0  0  0  0  0  0  0  0  0  0  0
   10.5630   -0.4735    0.0000 C   0  0  0  0  0  0  0  0  0  0  0  0
   10.9593   -1.2003    0.0000 C   0  0  0  0  0  0  0  0  0  0  0  0
   11.7868   -1.2204    0.0000 C   0  0  0  0  0  0  0  0  0  0  0  0
   12.2180   -0.5139    0.0000 C   0  0  0  0  0  0  0  0  0  0  0  0
   11.8217    0.2129    0.0000 O   0  0  0  0  0  0  0  0  0  0  0  0
   10.9942    0.2331    0.0000 C   0  0  0  0  0  0  0  0  0  0  0  0
  -12.3899    1.7273    0.0000 C   0  0  0  0  0  0  0  0  0  0  0  0
  -11.7722   -1.0680    0.0000 O   0  0  0  0  0  0  0  0  0  0  0  0
   -8.7475    2.2424    0.0000 C   0  0  0  0  0  0  0  0  0  0  0  0
   -8.9234   -0.6149    0.0000 O   0  0  0  0  0  0  0  0  0  0  0  0
   -5.5324   -0.7687    0.0000 O   0  0  0  0  0  0  0  0  0  0  0  0
   -1.7113    1.6282    0.0000 C   0  0  0  0  0  0  0  0  0  0  0  0
   -2.8945   -0.9786    0.0000 O   0  0  0  0  0  0  0  0  0  0  0  0
    1.0667   -1.9226    0.0000 O   0  0  0  0  0  0  0  0  0  0  0  0
    3.9493    1.4687    0.0000 C   0  0  0  0  0  0  0  0  0  0  0  0
    7.0412   -1.4132    0.0000 O   0  0  0  0  0  0  0  0  0  0  0  0
   10.5992    0.9574    0.0000 C   0  0  0  0  0  0  0  0  0  0  0  0
  -13.1955    1.5493    0.0000 O   0  5  0  0  0  0  0  0  0  0  0  0
  -12.1413    2.5139    0.0000 O   0  0  0  0  0  0  0  0  0  0  0  0
  -12.8880    0.1513    0.0000 O   0  0  0  0  0  0  0  0  0  0  0  0
   -5.5367    2.0940    0.0000 C   0  0  0  0  0  0  0  0  0  0  0  0
    0.4575    0.8745    0.0000 C   0  0  0  0  0  0  0  0  0  0  0  0
    7.5585    1.4024    0.0000 C   0  0  0  0  0  0  0  0  0  0  0  0
   13.0428   -0.5340    0.0000 O   0  0  0  0  0  0  0  0  0  0  0  0
   -7.2737   -0.7164    0.0000 N   0  0  0  0  0  0  0  0  0  0  0  0
   -7.4577   -1.5207    0.0000 S   0  0  0  0  0  0  0  0  0  0  0  0
   -8.2619   -1.3367    0.0000 O   0  0  0  0  0  0  0  0  0  0  0  0
   -6.6534   -1.7046    0.0000 O   0  0  0  0  0  0  0  0  0  0  0  0
   -7.6416   -2.3249    0.0000 O   0  5  0  0  0  0  0  0  0  0  0  0
   -6.3610    0.6614    0.0000 O   0  0  0  0  0  0  0  0  0  0  0  0
   -5.1253    2.8091    0.0000 O   0  0  0  0  0  0  0  0  0  0  0  0
   -6.3617    2.0928    0.0000 O   0  5  0  0  0  0  0  0  0  0  0  0
   -3.8797   -0.7662    0.0000 O   0  0  0  0  0  0  0  0  0  0  0  0
   -4.2911   -1.4813    0.0000 S   0  0  0  0  0  0  0  0  0  0  0  0
   -3.5760   -1.8928    0.0000 O   0  0  0  0  0  0  0  0  0  0  0  0
   -5.0062   -1.0699    0.0000 O   0  0  0  0  0  0  0  0  0  0  0  0
   -4.7025   -2.1964    0.0000 O   0  5  0  0  0  0  0  0  0  0  0  0
    0.7085    1.6604    0.0000 O   0  0  0  0  0  0  0  0  0  0  0  0
   -0.3486    0.6990    0.0000 O   0  5  0  0  0  0  0  0  0  0  0  0
    2.6816   -1.5709    0.0000 O   0  0  0  0  0  0  0  0  0  0  0  0
    2.2701   -2.2860    0.0000 S   0  0  0  0  0  0  0  0  0  0  0  0
    1.5551   -1.8745    0.0000 O   0  0  0  0  0  0  0  0  0  0  0  0
    2.9852   -2.6974    0.0000 O   0  0  0  0  0  0  0  0  0  0  0  0
    1.8587   -3.0010    0.0000 O   0  5  0  0  0  0  0  0  0  0  0  0
    5.7222   -1.3212    0.0000 N   0  0  0  0  0  0  0  0  0  0  0  0
    5.8514   -2.1360    0.0000 S   0  0  0  0  0  0  0  0  0  0  0  0
    5.1172   -2.5182    0.0000 O   0  0  0  0  0  0  0  0  0  0  0  0
    6.6663   -2.0068    0.0000 O   0  0  0  0  0  0  0  0  0  0  0  0
    5.9807   -2.9509    0.0000 O   0  5  0  0  0  0  0  0  0  0  0  0
    6.7471    1.5515    0.0000 O   0  5  0  0  0  0  0  0  0  0  0  0
    8.0933    2.0306    0.0000 O   0  0  0  0  0  0  0  0  0  0  0  0
    9.7745    0.9775    0.0000 O   0  0  0  0  0  0  0  0  0  0  0  0
    9.4107    1.7180    0.0000 S   0  0  0  0  0  0  0  0  0  0  0  0
   10.1512    2.0817    0.0000 O   0  0  0  0  0  0  0  0  0  0  0  0
    8.6702    1.3542    0.0000 O   0  0  0  0  0  0  0  0  0  0  0  0
    9.0469    2.4584    0.0000 O   0  5  0  0  0  0  0  0  0  0  0  0
   13.4378   -1.2583    0.0000 C   0  0  0  0  0  0  0  0  0  0  0  0
    8.6668   -1.7119    0.0000 O   0  0  0  0  0  0  0  0  0  0  0  0
    8.1320   -2.3400    0.0000 S   0  0  0  0  0  0  0  0  0  0  0  0
    8.7601   -2.8748    0.0000 O   0  0  0  0  0  0  0  0  0  0  0  0
    7.5038   -1.8052    0.0000 O   0  0  0  0  0  0  0  0  0  0  0  0
    7.5971   -2.9682    0.0000 O   0  5  0  0  0  0  0  0  0  0  0  0
   10.5295   -1.9045    0.0000 O   0  0  0  0  0  0  0  0  0  0  0  0
   12.1818   -1.9448    0.0000 N   0  0  0  0  0  0  0  0  0  0  0  0
   11.7349   -2.6383    0.0000 S   0  0  0  0  0  0  0  0  0  0  0  0
   12.4285   -3.0851    0.0000 O   0  0  0  0  0  0  0  0  0  0  0  0
   11.0414   -2.1914    0.0000 O   0  0  0  0  0  0  0  0  0  0  0  0
   11.2881   -3.3318    0.0000 O   0  5  0  0  0  0  0  0  0  0  0  0
  -10.1584   -0.7114    0.0000 O   0  0  0  0  0  0  0  0  0  0  0  0
  -10.4070   -1.4980    0.0000 S   0  0  0  0  0  0  0  0  0  0  0  0
   -9.6204   -1.7467    0.0000 O   0  0  0  0  0  0  0  0  0  0  0  0
  -11.1937   -1.2494    0.0000 O   0  0  0  0  0  0  0  0  0  0  0  0
  -10.6557   -2.2847    0.0000 O   0  5  0  0  0  0  0  0  0  0  0  0
   -9.5710    2.2931    0.0000 O   0  0  0  0  0  0  0  0  0  0  0  0
   -9.9388    3.0316    0.0000 S   0  0  0  0  0  0  0  0  0  0  0  0
   -9.2003    3.3994    0.0000 O   0  0  0  0  0  0  0  0  0  0  0  0
  -10.6772    2.6637    0.0000 O   0  0  0  0  0  0  0  0  0  0  0  0
  -10.3066    3.7700    0.0000 O   0  5  0  0  0  0  0  0  0  0  0  0
   -1.3895   -1.6617    0.0000 N   0  0  0  0  0  0  0  0  0  0  0  0
   -1.8744   -2.3292    0.0000 S   0  0  0  0  0  0  0  0  0  0  0  0
   -2.5418   -1.8442    0.0000 O   0  0  0  0  0  0  0  0  0  0  0  0
   -1.2069   -2.8141    0.0000 O   0  0  0  0  0  0  0  0  0  0  0  0
   -2.3593   -2.9966    0.0000 O   0  5  0  0  0  0  0  0  0  0  0  0
   -2.4625    1.9691    0.0000 O   0  0  0  0  0  0  0  0  0  0  0  0
   -2.5428    2.7902    0.0000 S   0  0  0  0  0  0  0  0  0  0  0  0
   -1.7218    2.8705    0.0000 O   0  0  0  0  0  0  0  0  0  0  0  0
   -3.3639    2.7099    0.0000 O   0  0  0  0  0  0  0  0  0  0  0  0
   -2.6232    3.6113    0.0000 O   0  5  0  0  0  0  0  0  0  0  0  0
    3.1251    1.4336    0.0000 O   0  0  0  0  0  0  0  0  0  0  0  0
    2.7126    2.1481    0.0000 S   0  0  0  0  0  0  0  0  0  0  0  0
    3.4270    2.5606    0.0000 O   0  0  0  0  0  0  0  0  0  0  0  0
    1.9981    1.7356    0.0000 O   0  0  0  0  0  0  0  0  0  0  0  0
    2.3001    2.8626    0.0000 O   0  5  0  0  0  0  0  0  0  0  0  0
    4.0709   -1.3914    0.0000 O   0  0  0  0  0  0  0  0  0  0  0  0
    4.2143   -2.2039    0.0000 S   0  0  0  0  0  0  0  0  0  0  0  0
    5.0267   -2.0605    0.0000 O   0  0  0  0  0  0  0  0  0  0  0  0
    3.4018   -2.3472    0.0000 O   0  0  0  0  0  0  0  0  0  0  0  0
    4.3576   -3.0163    0.0000 O   0  5  0  0  0  0  0  0  0  0  0  0
 18 19  1  0      
 19 20  1  0      
 20 21  1  0      
 21 22  1  0      
 22 23  1  0      
 23 18  1  0      
 22 24  1  1      
 25 24  1  6      
 25 26  1  0      
 26 27  1  0      
 27 28  1  0      
 28 29  1  0      
 29 30  1  0      
 30 25  1  0      
 28 95  1  6      
 31 32  1  0      
 32 33  1  0      
 33 34  1  0      
 34 35  1  0      
 35 36  1  0      
 36 31  1  0      
 34 37  1  1      
 38 37  1  6      
 38 39  1  0      
 39 40  1  0      
 40 41  1  0      
 41 42  1  0      
 42 43  1  0      
 43 38  1  0      
 41 44  1  6      
 45 44  1  6      
 45 46  1  0      
 46 47  1  0      
 47 48  1  0      
 48 49  1  0      
 49 50  1  0      
 50 45  1  0      
 48 51  1  1      
 52 51  1  6      
 52 53  1  0      
 53 54  1  0      
 54 55  1  0      
 55 56  1  0      
 56 57  1  0      
 57 52  1  0      
 55 58  1  6      
 59 58  1  6      
 59 60  1  0      
 60 61  1  0      
 61 62  1  0      
 62 63  1  0      
 63 64  1  0      
 64 59  1  0      
 62 65  1  1      
 66 65  1  6      
 66 67  1  0      
 67 68  1  0      
 68 69  1  0      
 69 70  1  0      
 70 71  1  0      
 71 66  1  0      
 18 72  1  6      
 20 73  1  1      
 30 74  1  1      
 26 75  1  1      
 32 76  1  1      
 43 77  1  1      
 39 78  1  1      
 46 79  1  1      
 57 80  1  1      
 53159  1  1      
 60 81  1  1      
 71 82  1  1      
 67128  1  1      
 74139  1  0      
 77149  1  0      
 80154  1  0      
 82117  1  0      
 72 83  1  0      
 72 84  2  0      
 19 85  1  6      
 21134  1  6      
 27 90  1  6      
 36 86  1  6      
 33 98  1  6      
 40144  1  6      
 50 87  1  6      
 47105  1  6      
 54110  1  6      
 64 88  1  6      
 61123  1  6      
 68129  1  6      
 69 89  1  6      
 90 91  1  0      
 91 92  2  0      
 91 93  2  0      
 91 94  1  0      
 31 95  1  6      
 86 96  2  0      
 86 97  1  0      
 98 99  1  0      
 99100  2  0      
 99101  2  0      
 99102  1  0      
 87103  2  0      
 87104  1  0      
105106  1  0      
106107  2  0      
106108  2  0      
106109  1  0      
110111  1  0      
111112  2  0      
111113  2  0      
111114  1  0      
 88115  1  0      
 88116  2  0      
117118  1  0      
118119  2  0      
118120  2  0      
118121  1  0      
 89122  1  0      
123124  1  0      
124125  2  0      
124126  2  0      
124127  1  0      
129130  1  0      
130131  2  0      
130132  2  0      
130133  1  0      
134135  1  0      
135136  2  0      
135137  2  0      
135138  1  0      
139140  1  0      
140141  2  0      
140142  2  0      
140143  1  0      
144145  1  0      
145146  2  0      
145147  2  0      
145148  1  0      
149150  1  0      
150151  2  0      
150152  2  0      
150153  1  0      
154155  1  0      
155156  2  0      
155157  2  0      
155158  1  0      
159160  1  0      
160161  2  0      
160162  2  0      
160163  1  0      
M  CHG  8   1   1   2   1   3   1   4   1   5   1   6   1   7   1   8   1
M  CHG  8   9   1  10   1  11   1  12   1  13   1  14   1  15   1  16   1
M  CHG  8  17   1  83  -1  94  -1  97  -1 102  -1 104  -1 109  -1 114  -1
M  CHG  8 115  -1 121  -1 127  -1 133  -1 138  -1 143  -1 148  -1 153  -1
M  CHG  2 158  -1 163  -1
M  END
